# Supplementary material for: Clinical Effect of Early vs Late Amyloid Positron Emission Tomography in Memory Clinic Patients: The AMYPAD-DPMS Randomized Clinical Trial
Source: PubMed Central journal article supplement (PMC10167601; doi:10.1001/jamaneurol.2023.0997), 2023-05-08
Supplement: jamaneurol-e230997-s003.pdf [file jamaneurol-e230997-s003.pdf]

\*First name, last name, and suffix (if applicable) are required and will appear in PubMed.

| <b>*Group Name(s): AMYPAD consortium</b> |                   |                              |                         |                    |                                                 |                                                                |                                                                                                   |
|------------------------------------------|-------------------|------------------------------|-------------------------|--------------------|-------------------------------------------------|----------------------------------------------------------------|---------------------------------------------------------------------------------------------------|
| <b>*First Name and Middle Initial(s)</b> | <b>*Last Name</b> | <b>*Suffix (eg, Jr, III)</b> | <b>Academic Degrees</b> | <b>Institution</b> | <b>Location (city, state/province, country)</b> | <b>Role or Contribution, eg, chair, principal investigator</b> | <b>Group (if more than 1 Group listed in the byline) and/or Subgroup (eg, Steering Committee)</b> |
| Carla                                    | Abdelnour         |                              |                         |                    |                                                 |                                                                |                                                                                                   |
| Nuria                                    | Aguilera          |                              |                         |                    |                                                 |                                                                |                                                                                                   |
| Leon                                     | Aksman            |                              |                         |                    |                                                 |                                                                |                                                                                                   |
| Emilio                                   | Alarcón-Martín    |                              |                         |                    |                                                 |                                                                |                                                                                                   |
| Montse                                   | Alegret           |                              |                         |                    |                                                 |                                                                |                                                                                                   |
| Silvia                                   | Alonso-Lana       |                              |                         |                    |                                                 |                                                                |                                                                                                   |
| Daniele                                  | Altomare          |                              |                         |                    |                                                 |                                                                |                                                                                                   |
| Pia                                      | Andersen          |                              |                         |                    |                                                 |                                                                |                                                                                                   |
| Majd                                     | Arab              |                              |                         |                    |                                                 |                                                                |                                                                                                   |
| Malin                                    | Aspö              |                              |                         |                    |                                                 |                                                                |                                                                                                   |
| Ilona                                    | Bader             |                              |                         |                    |                                                 |                                                                |                                                                                                   |
| Ilse                                     | Bader             |                              |                         |                    |                                                 |                                                                |                                                                                                   |
| Nigel                                    | Banton            |                              |                         |                    |                                                 |                                                                |                                                                                                   |
| Frederik                                 | Barkhof           |                              |                         |                    |                                                 |                                                                |                                                                                                   |
| Rodrigo                                  | Barnes            |                              |                         |                    |                                                 |                                                                |                                                                                                   |
| Dawn                                     | Barrie            |                              |                         |                    |                                                 |                                                                |                                                                                                   |
| Mark                                     | Battle            |                              |                         |                    |                                                 |                                                                |                                                                                                   |
| Ana                                      | Belén Collado     |                              |                         |                    |                                                 |                                                                |                                                                                                   |
| Julie                                    | Bellet            |                              |                         |                    |                                                 |                                                                |                                                                                                   |
| Johannes                                 | Berkhof           |                              |                         |                    |                                                 |                                                                |                                                                                                   |
| Marine                                   | Biger             |                              |                         |                    |                                                 |                                                                |                                                                                                   |
| Cindy                                    | Birck             |                              |                         |                    |                                                 |                                                                |                                                                                                   |
| Gerard                                   | Bischof           |                              |                         |                    |                                                 |                                                                |                                                                                                   |
| Mercè                                    | Boada             |                              |                         |                    |                                                 |                                                                |                                                                                                   |
| Ronald                                   | Boellaard         |                              |                         |                    |                                                 |                                                                |                                                                                                   |
| Nenad                                    | Bogdanovic        |                              |                         |                    |                                                 |                                                                |                                                                                                   |
| Ariane                                   | Bollack           |                              |                         |                    |                                                 |                                                                |                                                                                                   |
| Stéphanie                                | Bombois           |                              |                         |                    |                                                 |                                                                |                                                                                                   |
| Stefan                                   | Borg              |                              |                         |                    |                                                 |                                                                |                                                                                                   |
| Anne                                     | Borjesson-Hanson  |                              |                         |                    |                                                 |                                                                |                                                                                                   |
| Vladimir                                 | Boskov            |                              |                         |                    |                                                 |                                                                |                                                                                                   |

## Supplemental Online Content: Nonauthor Collaborators

\*First name, last name, and suffix (if applicable) are required and will appear in PubMed.

| *First Name and Middle Initial(s) | *Last Name            | *Suffix (eg, Jr, III) | Academic Degrees | Institution | Location (city, state/province, country) | Role or Contribution, eg, chair, principal investigator | Group (if more than 1 Group listed in the byline) and/or Subgroup (eg, Steering Committee) |
|-----------------------------------|-----------------------|-----------------------|------------------|-------------|------------------------------------------|---------------------------------------------------------|--------------------------------------------------------------------------------------------|
| Justine                           | Boutantin             |                       |                  |             |                                          |                                                         |                                                                                            |
| Claire                            | Boutoleau-Bretonniere |                       |                  |             |                                          |                                                         |                                                                                            |
| Femke                             | Bouwman               |                       |                  |             |                                          |                                                         |                                                                                            |
| Laetitia                          | Breuilh               |                       |                  |             |                                          |                                                         |                                                                                            |
| Eva                               | Bringman              |                       |                  |             |                                          |                                                         |                                                                                            |
| Baptiste                          | Brunel                |                       |                  |             |                                          |                                                         |                                                                                            |
| Marco                             | Bucci                 |                       |                  |             |                                          |                                                         |                                                                                            |
| Chris                             | Buckley               |                       |                  |             |                                          |                                                         |                                                                                            |
| Mar                               | Buendía               |                       |                  |             |                                          |                                                         |                                                                                            |
| Santi                             | Bullich               |                       |                  |             |                                          |                                                         |                                                                                            |
| Anna                              | Calvet                |                       |                  |             |                                          |                                                         |                                                                                            |
| Laia                              | Cañada                |                       |                  |             |                                          |                                                         |                                                                                            |
| Marta                             | Cañada                |                       |                  |             |                                          |                                                         |                                                                                            |
| Camilla                           | Caprioglio            |                       |                  |             |                                          |                                                         |                                                                                            |
| Jorge                             | Cardoso               |                       |                  |             |                                          |                                                         |                                                                                            |
| Jasmine                           | Carlier               |                       |                  |             |                                          |                                                         |                                                                                            |
| Elise                             | Carre                 |                       |                  |             |                                          |                                                         |                                                                                            |
| Isabelle                          | Carrie                |                       |                  |             |                                          |                                                         |                                                                                            |
| Pascaline                         | Cassagnaud            |                       |                  |             |                                          |                                                         |                                                                                            |
| Emmanuelle                        | Cassol                |                       |                  |             |                                          |                                                         |                                                                                            |
| Miguel                            | Castilla-Martí        |                       |                  |             |                                          |                                                         |                                                                                            |
| Elodie                            | Cazalon               |                       |                  |             |                                          |                                                         |                                                                                            |
| Tiphaine                          | Chaarriau             |                       |                  |             |                                          |                                                         |                                                                                            |
| Rachel                            | Chaigeau              |                       |                  |             |                                          |                                                         |                                                                                            |
| Taylor                            | Chalmers              |                       |                  |             |                                          |                                                         |                                                                                            |
| Marie-Thérèse                     | Clerc                 |                       |                  |             |                                          |                                                         |                                                                                            |
| Montserrat                        | Clerigue              |                       |                  |             |                                          |                                                         |                                                                                            |
| Emmanuel                          | Cognat                |                       |                  |             |                                          |                                                         |                                                                                            |
| Nina                              | Coll                  |                       |                  |             |                                          |                                                         |                                                                                            |
| Lyduine E.                        | Collij                |                       |                  |             |                                          |                                                         |                                                                                            |
| Peter                             | Connely               |                       |                  |             |                                          |                                                         |                                                                                            |
| Elodie                            | Cordier               |                       |                  |             |                                          |                                                         |                                                                                            |
| Corine                            | Costes                |                       |                  |             |                                          |                                                         |                                                                                            |

## Supplemental Online Content: Nonauthor Collaborators

\*First name, last name, and suffix (if applicable) are required and will appear in PubMed.

| *First Name and Middle Initial(s) | *Last Name          | *Suffix (eg, Jr, III) | Academic Degrees | Institution | Location (city, state/province, country) | Role or Contribution, eg, chair, principal investigator | Group (if more than 1 Group listed in the byline) and/or Subgroup (eg, Steering Committee) |
|-----------------------------------|---------------------|-----------------------|------------------|-------------|------------------------------------------|---------------------------------------------------------|--------------------------------------------------------------------------------------------|
| Camille                           | Coulangue           |                       |                  |             |                                          |                                                         |                                                                                            |
| Hélène                            | Courtemanche        |                       |                  |             |                                          |                                                         |                                                                                            |
| Eric                              | Creisson            |                       |                  |             |                                          |                                                         |                                                                                            |
| Charlotte                         | Crinquette          |                       |                  |             |                                          |                                                         |                                                                                            |
| Rosario                           | Cuevas              |                       |                  |             |                                          |                                                         |                                                                                            |
| Marie-Noëlle                      | Cufi                |                       |                  |             |                                          |                                                         |                                                                                            |
| Sophie                            | Dardenne            |                       |                  |             |                                          |                                                         |                                                                                            |
| Maria                             | de Arriba           |                       |                  |             |                                          |                                                         |                                                                                            |
| Casper                            | de Costa Luis       |                       |                  |             |                                          |                                                         |                                                                                            |
| Yvonne                            | de Gier             |                       |                  |             |                                          |                                                         |                                                                                            |
| Delphine                          | de Verbizier Lonjon |                       |                  |             |                                          |                                                         |                                                                                            |
| Veronique                         | Dekker              |                       |                  |             |                                          |                                                         |                                                                                            |
| Bérengère                         | Dekyndt             |                       |                  |             |                                          |                                                         |                                                                                            |
| Xavier                            | Delbeuck            |                       |                  |             |                                          |                                                         |                                                                                            |
| Julien                            | Delrieu             |                       |                  |             |                                          |                                                         |                                                                                            |
| Jean-François                     | Demonet             |                       |                  |             |                                          |                                                         |                                                                                            |
| Vincent                           | Deramecourt         |                       |                  |             |                                          |                                                         |                                                                                            |
| Françoise                         | Desclaux            |                       |                  |             |                                          |                                                         |                                                                                            |
| Carlos                            | Diaz                |                       |                  |             |                                          |                                                         |                                                                                            |
| Susana                            | Diego               |                       |                  |             |                                          |                                                         |                                                                                            |
| Mehdi                             | Djafar              |                       |                  |             |                                          |                                                         |                                                                                            |
| Britta                            | Dölle               |                       |                  |             |                                          |                                                         |                                                                                            |
| Laura                             | Doull               |                       |                  |             |                                          |                                                         |                                                                                            |
| Laurence                          | Dricot              |                       |                  |             |                                          |                                                         |                                                                                            |
| Alexander                         | Drzezga             |                       |                  |             |                                          |                                                         |                                                                                            |
| Bruno                             | Dubois              |                       |                  |             |                                          |                                                         |                                                                                            |
| Julien                            | Dumont              |                       |                  |             |                                          |                                                         |                                                                                            |
| Jean                              | Dumur               |                       |                  |             |                                          |                                                         |                                                                                            |
| Julien                            | Dumurgier           |                       |                  |             |                                          |                                                         |                                                                                            |
| Martin                            | Dvorak              |                       |                  |             |                                          |                                                         |                                                                                            |
| Mirian                            | Ecay                |                       |                  |             |                                          |                                                         |                                                                                            |
| Paul                              | Edison              |                       |                  |             |                                          |                                                         |                                                                                            |

## Supplemental Online Content: Nonauthor Collaborators

\*First name, last name, and suffix (if applicable) are required and will appear in PubMed.

| *First Name and Middle Initial(s) | *Last Name      | *Suffix (eg, Jr, III) | Academic Degrees | Institution | Location (city, state/province, country) | Role or Contribution, eg, chair, principal investigator | Group (if more than 1 Group listed in the byline) and/or Subgroup (eg, Steering Committee) |
|-----------------------------------|-----------------|-----------------------|------------------|-------------|------------------------------------------|---------------------------------------------------------|--------------------------------------------------------------------------------------------|
| Claus                             | Escher          |                       |                  |             |                                          |                                                         |                                                                                            |
| Ainara                            | Estanga         |                       |                  |             |                                          |                                                         |                                                                                            |
| Ester                             | Esteban         |                       |                  |             |                                          |                                                         |                                                                                            |
| Guy                               | Fanjaud         |                       |                  |             |                                          |                                                         |                                                                                            |
| Gill                              | Farrar          |                       |                  |             |                                          |                                                         |                                                                                            |
| Karine                            | Fauria          |                       |                  |             |                                          |                                                         |                                                                                            |
| Marta                             | Felez Sanchez   |                       |                  |             |                                          |                                                         |                                                                                            |
| Patrick                           | Feukam Talla    |                       |                  |             |                                          |                                                         |                                                                                            |
| Lisa                              | Ford            |                       |                  |             |                                          |                                                         |                                                                                            |
| Giovanni B.                       | Frisoni         |                       |                  |             |                                          |                                                         |                                                                                            |
| David                             | Fuster          |                       |                  |             |                                          |                                                         |                                                                                            |
| Audrey                            | Gabelle         |                       |                  |             |                                          |                                                         |                                                                                            |
| Valentina                         | Garibotto       |                       |                  |             |                                          |                                                         |                                                                                            |
| Sinead                            | Gaubert         |                       |                  |             |                                          |                                                         |                                                                                            |
| Cédric                            | Gauci           |                       |                  |             |                                          |                                                         |                                                                                            |
| Christine                         | Geldhof         |                       |                  |             |                                          |                                                         |                                                                                            |
| Jean                              | Georges         |                       |                  |             |                                          |                                                         |                                                                                            |
| Joseph                            | Ghika           |                       |                  |             |                                          |                                                         |                                                                                            |
| Rossella                          | Gismondi        |                       |                  |             |                                          |                                                         |                                                                                            |
| Juan Domingo                      | Gispert         |                       |                  |             |                                          |                                                         |                                                                                            |
| Elena                             | González        |                       |                  |             |                                          |                                                         |                                                                                            |
| Valerie                           | Goovaerts       |                       |                  |             |                                          |                                                         |                                                                                            |
| Denis Mariano                     | Goulart         |                       |                  |             |                                          |                                                         |                                                                                            |
| Caroline                          | Grasselli       |                       |                  |             |                                          |                                                         |                                                                                            |
| Oriol                             | Grau-Rivera     |                       |                  |             |                                          |                                                         |                                                                                            |
| Katherine                         | Gray            |                       |                  |             |                                          |                                                         |                                                                                            |
| Martin                            | Greensmith      |                       |                  |             |                                          |                                                         |                                                                                            |
| Laure                             | Grozn           |                       |                  |             |                                          |                                                         |                                                                                            |
| Céline                            | Guillemaud      |                       |                  |             |                                          |                                                         |                                                                                            |
| Fiona                             | Gunn            |                       |                  |             |                                          |                                                         |                                                                                            |
| Prasad                            | Guntur Ramkumar |                       |                  |             |                                          |                                                         |                                                                                            |
| Göran                             | Hagman          |                       |                  |             |                                          |                                                         |                                                                                            |
| Bernard                           | Hanseeuw        |                       |                  |             |                                          |                                                         |                                                                                            |

## Supplemental Online Content: Nonauthor Collaborators

\*First name, last name, and suffix (if applicable) are required and will appear in PubMed.

| *First Name and Middle Initial(s) | *Last Name   | *Suffix (eg, Jr, III) | Academic Degrees | Institution | Location (city, state/province, country) | Role or Contribution, eg, chair, principal investigator | Group (if more than 1 Group listed in the byline) and/or Subgroup (eg, Steering Committee) |
|-----------------------------------|--------------|-----------------------|------------------|-------------|------------------------------------------|---------------------------------------------------------|--------------------------------------------------------------------------------------------|
| Fiona                             | Heeman       |                       |                  |             |                                          |                                                         |                                                                                            |
| Janine                            | Hendriks     |                       |                  |             |                                          |                                                         |                                                                                            |
| Jakob                             | Himmelmann   |                       |                  |             |                                          |                                                         |                                                                                            |
| Anne                              | Hitzel       |                       |                  |             |                                          |                                                         |                                                                                            |
| Florent                           | Hives        |                       |                  |             |                                          |                                                         |                                                                                            |
| Merle                             | Hoening      |                       |                  |             |                                          |                                                         |                                                                                            |
| Claire                            | Hourrègue    |                       |                  |             |                                          |                                                         |                                                                                            |
| Justine                           | Hudson       |                       |                  |             |                                          |                                                         |                                                                                            |
| Jordi                             | Huguet       |                       |                  |             |                                          |                                                         |                                                                                            |
| Marta                             | Ibarria      |                       |                  |             |                                          |                                                         |                                                                                            |
| Ifrah                             | Iidow        |                       |                  |             |                                          |                                                         |                                                                                            |
| Sandrine                          | Indart       |                       |                  |             |                                          |                                                         |                                                                                            |
| Silvia                            | Ingala       |                       |                  |             |                                          |                                                         |                                                                                            |
| Adrian                            | Ivanoiu      |                       |                  |             |                                          |                                                         |                                                                                            |
| Charlotte                         | Jacquemont   |                       |                  |             |                                          |                                                         |                                                                                            |
| Vesna                             | Jelic        |                       |                  |             |                                          |                                                         |                                                                                            |
| Frank                             | Jessen       |                       |                  |             |                                          |                                                         |                                                                                            |
| Jieqing                           | Jiao         |                       |                  |             |                                          |                                                         |                                                                                            |
| Sara                              | Jofresa      |                       |                  |             |                                          |                                                         |                                                                                            |
| Cathrine                          | Jonsson      |                       |                  |             |                                          |                                                         |                                                                                            |
| Dzmitry                           | Kaliukhovich |                       |                  |             |                                          |                                                         |                                                                                            |
| Silke                             | Kern         |                       |                  |             |                                          |                                                         |                                                                                            |
| Miia                              | Kivipelto    |                       |                  |             |                                          |                                                         |                                                                                            |
| Iva                               | Knezevic     |                       |                  |             |                                          |                                                         |                                                                                            |
| Grégory                           | Kuchcinski   |                       |                  |             |                                          |                                                         |                                                                                            |
| Manon                             | Laforce      |                       |                  |             |                                          |                                                         |                                                                                            |
| Asunción                          | Lafuente     |                       |                  |             |                                          |                                                         |                                                                                            |
| Françoise                         | Lala         |                       |                  |             |                                          |                                                         |                                                                                            |
| Adriaan                           | Lammertsma   |                       |                  |             |                                          |                                                         |                                                                                            |
| Michelle                          | Lax          |                       |                  |             |                                          |                                                         |                                                                                            |
| Thibaud                           | Lebouvier    |                       |                  |             |                                          |                                                         |                                                                                            |
| Ho-Yun                            | Lee          |                       |                  |             |                                          |                                                         |                                                                                            |
| Lean                              | Lee          |                       |                  |             |                                          |                                                         |                                                                                            |
| Annebet                           | Leeuwis      |                       |                  |             |                                          |                                                         |                                                                                            |

## Supplemental Online Content: Nonauthor Collaborators

\*First name, last name, and suffix (if applicable) are required and will appear in PubMed.

| *First Name and Middle Initial(s) | *Last Name       | *Suffix (eg, Jr, III) | Academic Degrees | Institution | Location (city, state/province, country) | Role or Contribution, eg, chair, principal investigator | Group (if more than 1 Group listed in the byline) and/or Subgroup (eg, Steering Committee) |
|-----------------------------------|------------------|-----------------------|------------------|-------------|------------------------------------------|---------------------------------------------------------|--------------------------------------------------------------------------------------------|
| Amandine                          | Lefort           |                       |                  |             |                                          |                                                         |                                                                                            |
| Jean-François                     | Legrand          |                       |                  |             |                                          |                                                         |                                                                                            |
| Mélanie                           | Leroy            |                       |                  |             |                                          |                                                         |                                                                                            |
| Constance                         | Lesoil Markowski |                       |                  |             |                                          |                                                         |                                                                                            |
| Marcel                            | Levy             |                       |                  |             |                                          |                                                         |                                                                                            |
| Renaud                            | Lhommel          |                       |                  |             |                                          |                                                         |                                                                                            |
| Renaud                            | Lopes            |                       |                  |             |                                          |                                                         |                                                                                            |
| Isadora                           | Lopes Alves      |                       |                  |             |                                          |                                                         |                                                                                            |
| Luigi                             | Lorenzini        |                       |                  |             |                                          |                                                         |                                                                                            |
| Adrien                            | Lorette          |                       |                  |             |                                          |                                                         |                                                                                            |
| Emma                              | Luckett          |                       |                  |             |                                          |                                                         |                                                                                            |
| Marie                             | Lundin           |                       |                  |             |                                          |                                                         |                                                                                            |
| Marie-Anne                        | Mackowiak        |                       |                  |             |                                          |                                                         |                                                                                            |
| Vincent                           | Malotaux         |                       |                  |             |                                          |                                                         |                                                                                            |
| Richard                           | Manber           |                       |                  |             |                                          |                                                         |                                                                                            |
| Nikolay                           | Manyakov         |                       |                  |             |                                          |                                                         |                                                                                            |
| Pawel                             | Markiewicz       |                       |                  |             |                                          |                                                         |                                                                                            |
| Paula                             | Marne            |                       |                  |             |                                          |                                                         |                                                                                            |
| Marta                             | Marquié          |                       |                  |             |                                          |                                                         |                                                                                            |
| Elvira                            | Martín           |                       |                  |             |                                          |                                                         |                                                                                            |
| Joan                              | Martínez         |                       |                  |             |                                          |                                                         |                                                                                            |
| Pablo                             | Martinez Lage    |                       |                  |             |                                          |                                                         |                                                                                            |
| Sophie E.                         | Mastenbroek      |                       |                  |             |                                          |                                                         |                                                                                            |
| Aurélien                          | Maureille        |                       |                  |             |                                          |                                                         |                                                                                            |
| Karen                             | Meersmans        |                       |                  |             |                                          |                                                         |                                                                                            |
| Anja                              | Mett             |                       |                  |             |                                          |                                                         |                                                                                            |
| Joseph                            | Milne            |                       |                  |             |                                          |                                                         |                                                                                            |
| Carolina                          | Minguillón       |                       |                  |             |                                          |                                                         |                                                                                            |
| Marc                              | Modat            |                       |                  |             |                                          |                                                         |                                                                                            |
| José Luis                         | Molinuevo        |                       |                  |             |                                          |                                                         |                                                                                            |
| Laura                             | Montreal         |                       |                  |             |                                          |                                                         |                                                                                            |
| Christian                         | Moro             |                       |                  |             |                                          |                                                         |                                                                                            |
| Theresa                           | Müller           |                       |                  |             |                                          |                                                         |                                                                                            |

## Supplemental Online Content: Nonauthor Collaborators

\*First name, last name, and suffix (if applicable) are required and will appear in PubMed.

| *First Name and Middle Initial(s) | *Last Name               | *Suffix (eg, Jr, III) | Academic Degrees | Institution | Location (city, state/province, country) | Role or Contribution, eg, chair, principal investigator | Group (if more than 1 Group listed in the byline) and/or Subgroup (eg, Steering Committee) |
|-----------------------------------|--------------------------|-----------------------|------------------|-------------|------------------------------------------|---------------------------------------------------------|--------------------------------------------------------------------------------------------|
| Graciela                          | Muniz                    |                       |                  |             |                                          |                                                         |                                                                                            |
| Henk Jan                          | Mutsarts                 |                       |                  |             |                                          |                                                         |                                                                                            |
| Ted                               | Nilsson                  |                       |                  |             |                                          |                                                         |                                                                                            |
| Aida                              | Ninerola                 |                       |                  |             |                                          |                                                         |                                                                                            |
| Agneta                            | Nordberg                 |                       |                  |             |                                          |                                                         |                                                                                            |
| Wilse                             | Novaes                   |                       |                  |             |                                          |                                                         |                                                                                            |
| Joao                              | Nuno Carmelo Pires Silva |                       |                  |             |                                          |                                                         |                                                                                            |
| Greg                              | Operto                   |                       |                  |             |                                          |                                                         |                                                                                            |
| Adela                             | Orellana                 |                       |                  |             |                                          |                                                         |                                                                                            |
| Pierre-Jean                       | Ousset                   |                       |                  |             |                                          |                                                         |                                                                                            |
| Olivier                           | Outteryck                |                       |                  |             |                                          |                                                         |                                                                                            |
| Amandine                          | Pallardy                 |                       |                  |             |                                          |                                                         |                                                                                            |
| Alessandro                        | Palombit                 |                       |                  |             |                                          |                                                         |                                                                                            |
| Ana                               | Pancho                   |                       |                  |             |                                          |                                                         |                                                                                            |
| Martin                            | Pappon                   |                       |                  |             |                                          |                                                         |                                                                                            |
| Claire                            | Paquet                   |                       |                  |             |                                          |                                                         |                                                                                            |
| Jérémie                           | Pariente                 |                       |                  |             |                                          |                                                         |                                                                                            |
| Florence                          | Pasquier                 |                       |                  |             |                                          |                                                         |                                                                                            |
| Pierre                            | Payoux                   |                       |                  |             |                                          |                                                         |                                                                                            |
| Harry                             | Peaker                   |                       |                  |             |                                          |                                                         |                                                                                            |
| Esther                            | Pelejà                   |                       |                  |             |                                          |                                                         |                                                                                            |
| Delphine                          | Pennetier                |                       |                  |             |                                          |                                                         |                                                                                            |
| Alba                              | Pérez-Cordón             |                       |                  |             |                                          |                                                         |                                                                                            |
| Andrés                            | Perissinotti             |                       |                  |             |                                          |                                                         |                                                                                            |
| Matthieu Paul                     | Perrenoud                |                       |                  |             |                                          |                                                         |                                                                                            |
| Sandrine                          | Petit                    |                       |                  |             |                                          |                                                         |                                                                                            |
| Grégory                           | Petyt                    |                       |                  |             |                                          |                                                         |                                                                                            |
| Julia                             | Pfeil                    |                       |                  |             |                                          |                                                         |                                                                                            |
| Blanche                           | Pirotte                  |                       |                  |             |                                          |                                                         |                                                                                            |
| Sandra                            | Pla                      |                       |                  |             |                                          |                                                         |                                                                                            |
| Sonia                             | Plaza Wuthrich           |                       |                  |             |                                          |                                                         |                                                                                            |

## Supplemental Online Content: Nonauthor Collaborators

\*First name, last name, and suffix (if applicable) are required and will appear in PubMed.

| *First Name and Middle Initial(s) | *Last Name    | *Suffix (eg, Jr, III) | Academic Degrees | Institution | Location (city, state/province, country) | Role or Contribution, eg, chair, principal investigator | Group (if more than 1 Group listed in the byline) and/or Subgroup (eg, Steering Committee) |
|-----------------------------------|---------------|-----------------------|------------------|-------------|------------------------------------------|---------------------------------------------------------|--------------------------------------------------------------------------------------------|
| Lea                               | Poitrine      |                       |                  |             |                                          |                                                         |                                                                                            |
| Marianne                          | Pollet        |                       |                  |             |                                          |                                                         |                                                                                            |
| Jean-Benoit                       | Poncelet      |                       |                  |             |                                          |                                                         |                                                                                            |
| John                              | Prior         |                       |                  |             |                                          |                                                         |                                                                                            |
| Jean-Pierre                       | Pruvo         |                       |                  |             |                                          |                                                         |                                                                                            |
| Pauline                           | Putallaz      |                       |                  |             |                                          |                                                         |                                                                                            |
| Mathieu                           | Queneau       |                       |                  |             |                                          |                                                         |                                                                                            |
| Lisa                              | Quenon        |                       |                  |             |                                          |                                                         |                                                                                            |
| Andreea                           | Rădoi         |                       |                  |             |                                          |                                                         |                                                                                            |
| Marie                             | Rafiq         |                       |                  |             |                                          |                                                         |                                                                                            |
| Fiona                             | Ramage        |                       |                  |             |                                          |                                                         |                                                                                            |
| Maribel                           | Ramis         |                       |                  |             |                                          |                                                         |                                                                                            |
| Michael                           | Reinwald      |                       |                  |             |                                          |                                                         |                                                                                            |
| Gonzalo                           | Rios          |                       |                  |             |                                          |                                                         |                                                                                            |
| Craig                             | Ritchie       |                       |                  |             |                                          |                                                         |                                                                                            |
| Elena                             | Rodriguez     |                       |                  |             |                                          |                                                         |                                                                                            |
| Adeline                           | Rollin        |                       |                  |             |                                          |                                                         |                                                                                            |
| Olivier                           | Rouaud        |                       |                  |             |                                          |                                                         |                                                                                            |
| Simona                            | Sacuiu        |                       |                  |             |                                          |                                                         |                                                                                            |
| Laure                             | Saint-Aubert  |                       |                  |             |                                          |                                                         |                                                                                            |
| Arianna                           | Sala          |                       |                  |             |                                          |                                                         |                                                                                            |
| Anne-Sophie                       | Salabert      |                       |                  |             |                                          |                                                         |                                                                                            |
| Jon                               | Saldias       |                       |                  |             |                                          |                                                         |                                                                                            |
| Gemma                             | Salvadó       |                       |                  |             |                                          |                                                         |                                                                                            |
| Angela                            | Sanabria      |                       |                  |             |                                          |                                                         |                                                                                            |
| Lena                              | Sannemann     |                       |                  |             |                                          |                                                         |                                                                                            |
| Nathalie                          | Sastre        |                       |                  |             |                                          |                                                         |                                                                                            |
| Daniela                           | Savina        |                       |                  |             |                                          |                                                         |                                                                                            |
| Irina                             | Savitcheva    |                       |                  |             |                                          |                                                         |                                                                                            |
| Jolien                            | Schaefferbeke |                       |                  |             |                                          |                                                         |                                                                                            |
| Philip                            | Scheltens     |                       |                  |             |                                          |                                                         |                                                                                            |
| Carine                            | Schildermans  |                       |                  |             |                                          |                                                         |                                                                                            |
| Mark                              | Schmidt       |                       |                  |             |                                          |                                                         |                                                                                            |
| Michael                           | Schöll        |                       |                  |             |                                          |                                                         |                                                                                            |



## Supplemental Online Content: Nonauthor Collaborators

\*First name, last name, and suffix (if applicable) are required and will appear in PubMed.

| *First Name and Middle Initial(s) | *Last Name      | *Suffix (eg, Jr, III) | Academic Degrees | Institution | Location (city, state/province, country) | Role or Contribution, eg, chair, principal investigator | Group (if more than 1 Group listed in the byline) and/or Subgroup (eg, Steering Committee) |
|-----------------------------------|-----------------|-----------------------|------------------|-------------|------------------------------------------|---------------------------------------------------------|--------------------------------------------------------------------------------------------|
| Jeroen                            | Schuermans      |                       |                  |             |                                          |                                                         |                                                                                            |
| Franck                            | Semah           |                       |                  |             |                                          |                                                         |                                                                                            |
| Mahnaz                            | Shekari         |                       |                  |             |                                          |                                                         |                                                                                            |
| Ingmar                            | Skoog           |                       |                  |             |                                          |                                                         |                                                                                            |
| Oscar                             | Sotolongo-Grau  |                       |                  |             |                                          |                                                         |                                                                                            |
| Andrew                            | Stephens        |                       |                  |             |                                          |                                                         |                                                                                            |
| Tiffany                           | Stewart         |                       |                  |             |                                          |                                                         |                                                                                            |
| Jennyfer                          | Stutzmann       |                       |                  |             |                                          |                                                         |                                                                                            |
| Murray                            | Tait            |                       |                  |             |                                          |                                                         |                                                                                            |
| Lluis                             | Tárraga         |                       |                  |             |                                          |                                                         |                                                                                            |
| Juan Pablo                        | Tartari         |                       |                  |             |                                          |                                                         |                                                                                            |
| Ann-christine                     | Tysen-backstrom |                       |                  |             |                                          |                                                         |                                                                                            |
| Sergi                             | Valero          |                       |                  |             |                                          |                                                         |                                                                                            |
| David                             | Vallez Garcia   |                       |                  |             |                                          |                                                         |                                                                                            |
| Bart N.M.                         | van Berckel     |                       |                  |             |                                          |                                                         |                                                                                            |
| Martijn                           | van Essen       |                       |                  |             |                                          |                                                         |                                                                                            |
| Koen                              | Van Laere       |                       |                  |             |                                          |                                                         |                                                                                            |
| Jeroen                            | van Leur        |                       |                  |             |                                          |                                                         |                                                                                            |
| Ingrid S.                         | van Maurik      |                       |                  |             |                                          |                                                         |                                                                                            |
| Rik                               | Vandenbergh     |                       |                  |             |                                          |                                                         |                                                                                            |
| Bruno                             | Vellas          |                       |                  |             |                                          |                                                         |                                                                                            |
| Jukka                             | Virolinen       |                       |                  |             |                                          |                                                         |                                                                                            |
| Pieter Jelle                      | Visser          |                       |                  |             |                                          |                                                         |                                                                                            |
| Zuzana                            | Walker          |                       |                  |             |                                          |                                                         |                                                                                            |
| Håkan                             | Walles          |                       |                  |             |                                          |                                                         |                                                                                            |
| Emilia                            | Wallin          |                       |                  |             |                                          |                                                         |                                                                                            |
| Grant                             | Whitelaw        |                       |                  |             |                                          |                                                         |                                                                                            |
| Catriona                          | Wimberley       |                       |                  |             |                                          |                                                         |                                                                                            |
| Zarni                             | Win             |                       |                  |             |                                          |                                                         |                                                                                            |
| Alle Meije                        | Wink            |                       |                  |             |                                          |                                                         |                                                                                            |
| Robin                             | Wolz            |                       |                  |             |                                          |                                                         |                                                                                            |

Supplemental Online Content: Nonauthor Collaborators

\*First name, last name, and suffix (if applicable) are required and will appear in PubMed.

| <b>*First Name and Middle Initial(s)</b> | <b>*Last Name</b> | <b>*Suffix (eg, Jr, III)</b> | Academic Degrees | Institution | Location (city, state/province, country) | Role or Contribution, eg, chair, principal investigator | Group (if more than 1 Group listed in the byline) and/or Subgroup (eg, Steering Committee) |
|------------------------------------------|-------------------|------------------------------|------------------|-------------|------------------------------------------|---------------------------------------------------------|--------------------------------------------------------------------------------------------|
| John                                     | Woodside          |                              |                  |             |                                          |                                                         |                                                                                            |
| Maqsood                                  | Yaqub             |                              |                  |             |                                          |                                                         |                                                                                            |
| Anna                                     | Zettergren        |                              |                  |             |                                          |                                                         |                                                                                            |
| Philip                                   | Zeyen             |                              |                  |             |                                          |                                                         |                                                                                            |
