# Supplementary material for: Clinical Effect of Early vs Late Amyloid Positron Emission Tomography in Memory Clinic Patients: The AMYPAD-DPMS Randomized Clinical Trial
Source: PubMed Central journal article supplement (PMC10167601; doi:10.1001/jamaneurol.2023.0997), 2023-05-08
Supplement: jamaneurol-e230997-s004.pdf [file jamaneurol-e230997-s004.pdf]

## Data Sharing Statement

Altomare. Clinical Effect of Early vs Late Amyloid Positron Emission Tomography in Memory Clinic Patients. *JAMA Neurol.* Published May 08, 2023. doi:10.1001/jamaneurol.2023.0997

### Data

**Data available:** Yes

**Data types:** Deidentified participant data, Data dictionary

**How to access data:** Anonymized data collected for the study and additional documents (e.g. study protocol, informed consent form) may be made available to others upon request and after the approval of a proposal by the AMYPAD consortium.

**When available:** beginning date: 10-01-2022

### Supporting Documents

**Document types:** None

### Additional Information

**Who can access the data:** Data will be made available to researchers whose proposed use of the data has been approved.

**Types of analyses:** Data will be made available for any purpose.

**Mechanisms of data availability:** Data will be made available after approval of a proposal.
